# Supplementary material
Source: PubMed Central journal article supplement (PMC3549529)

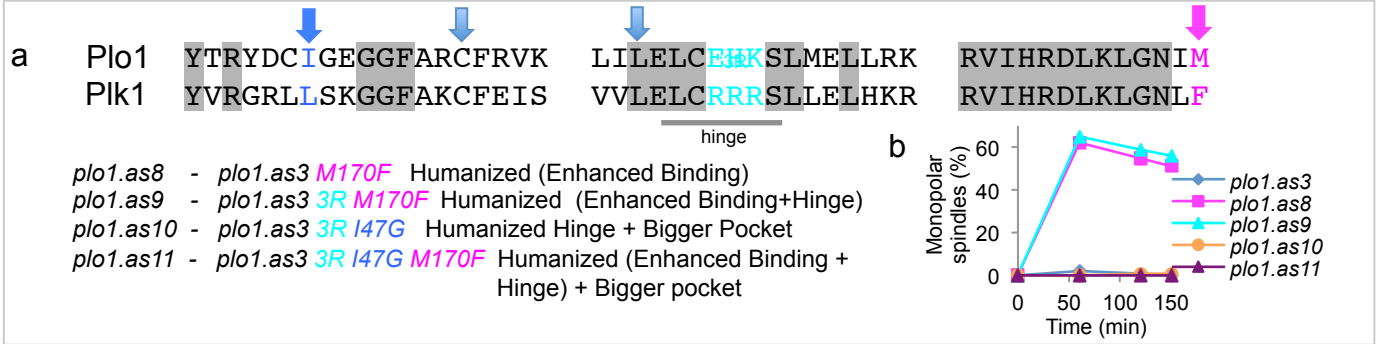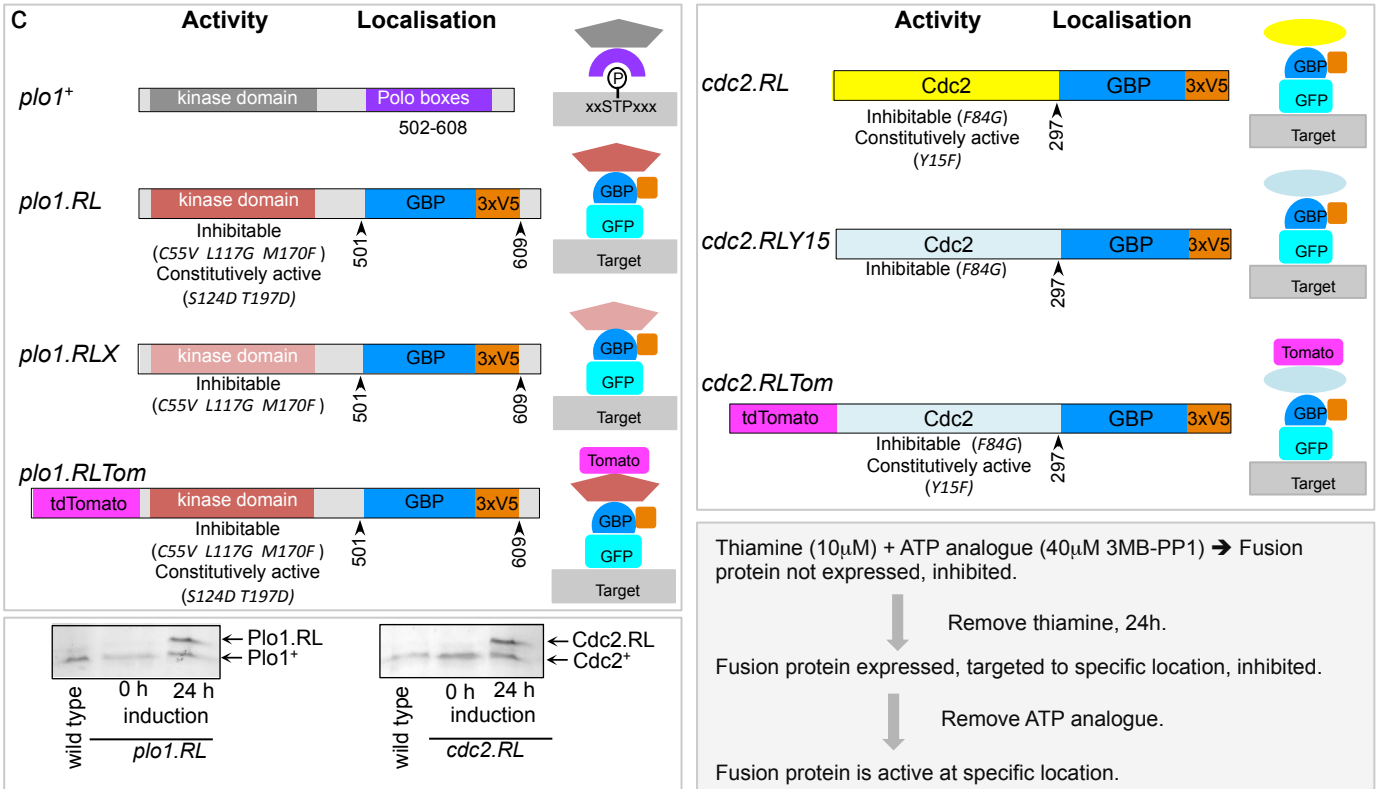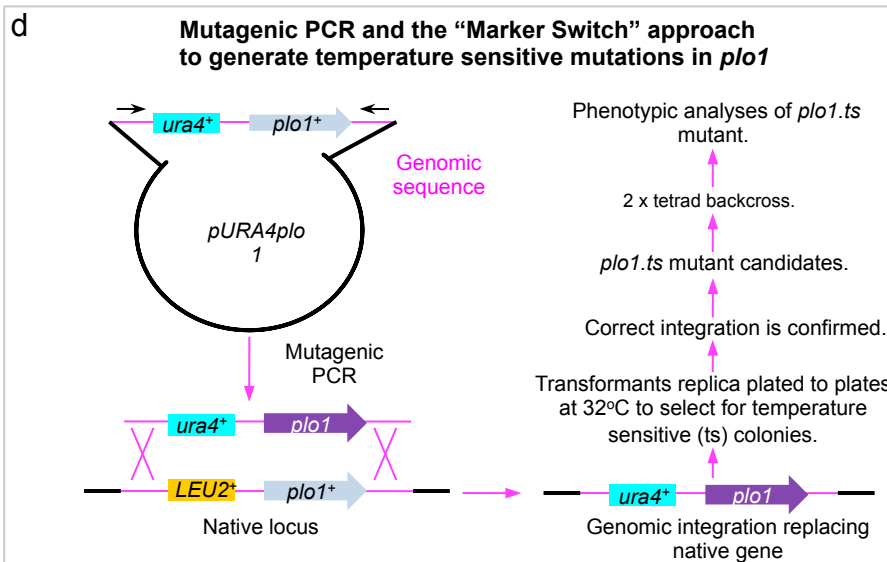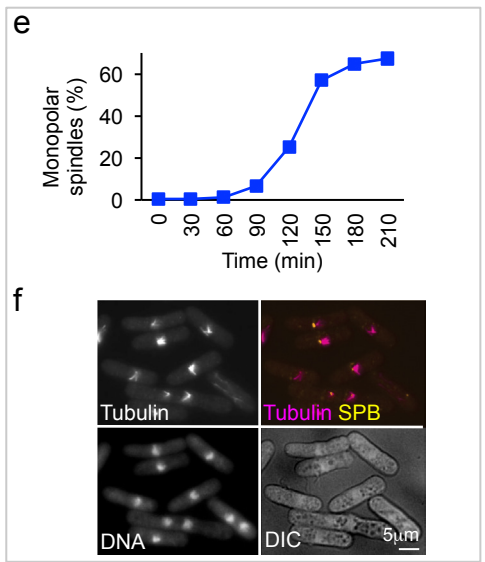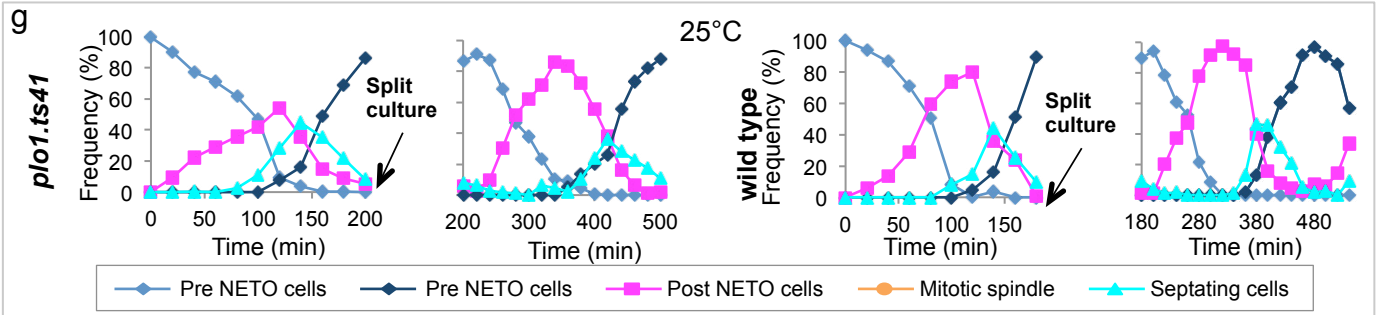

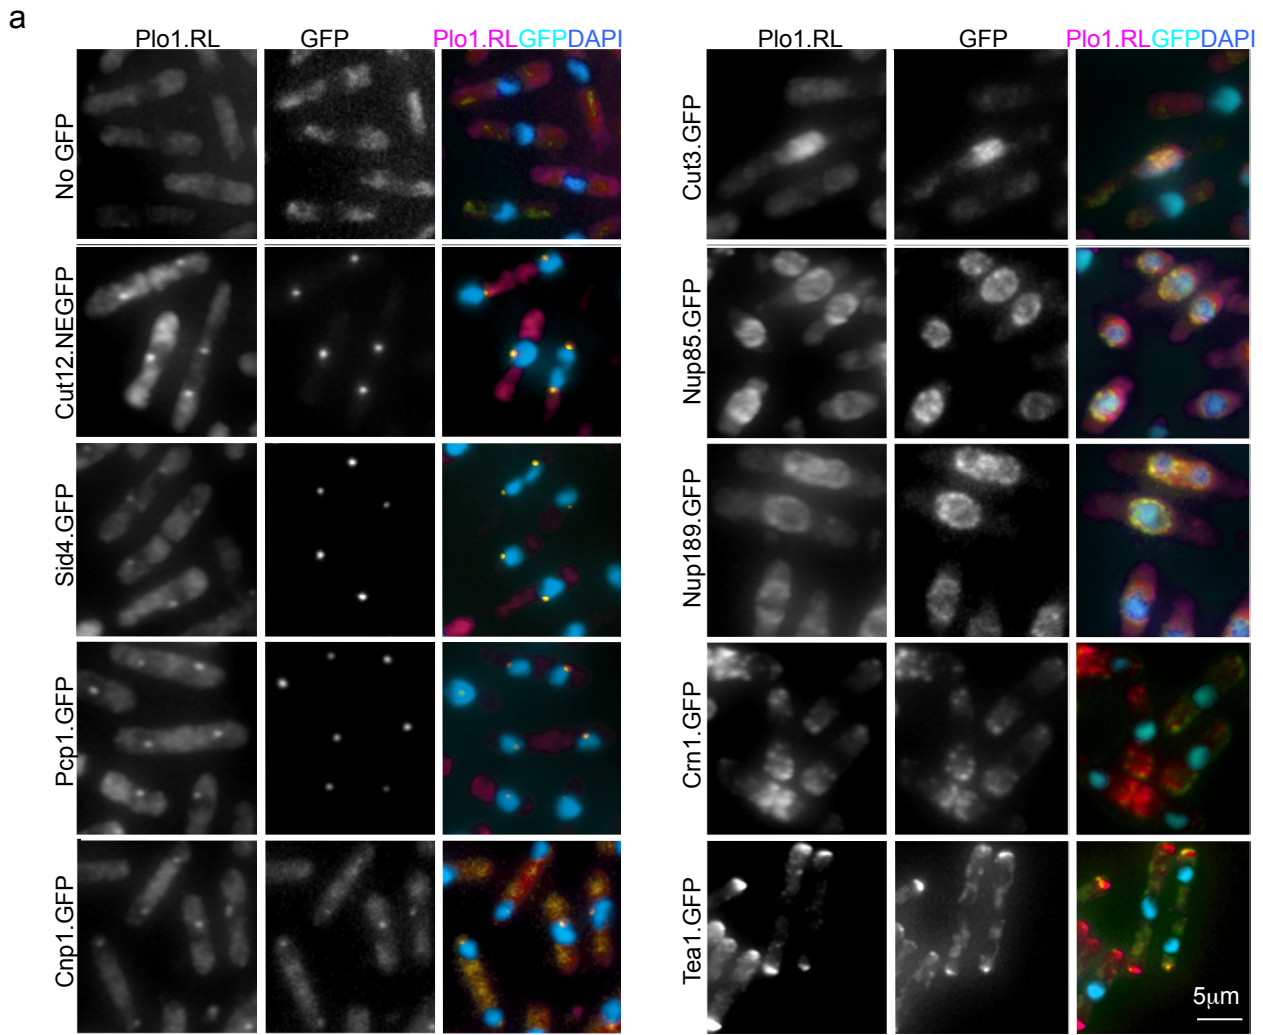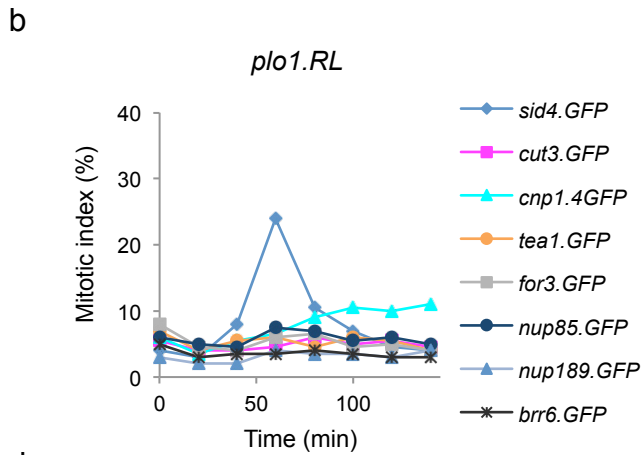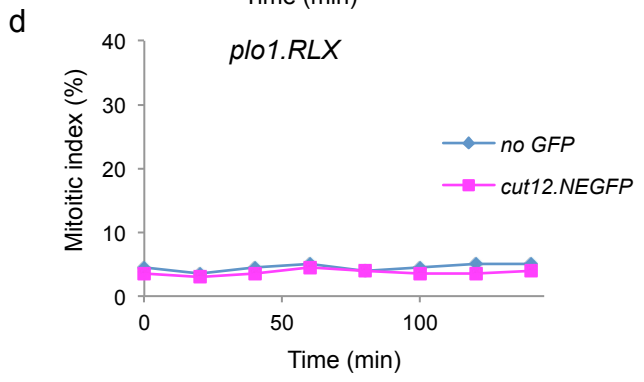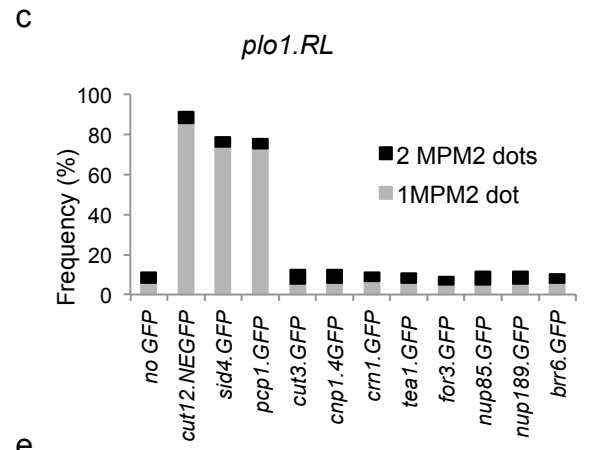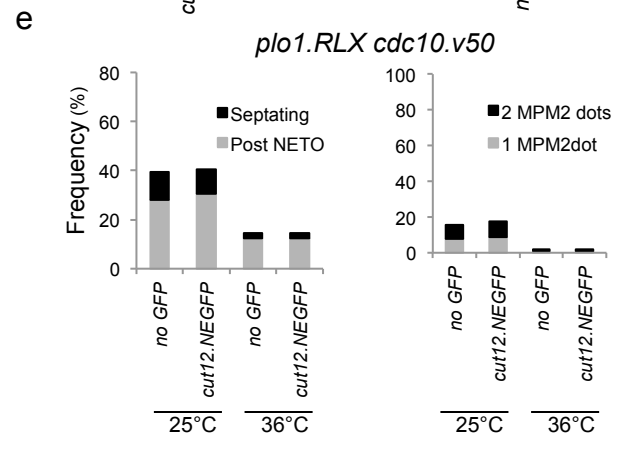

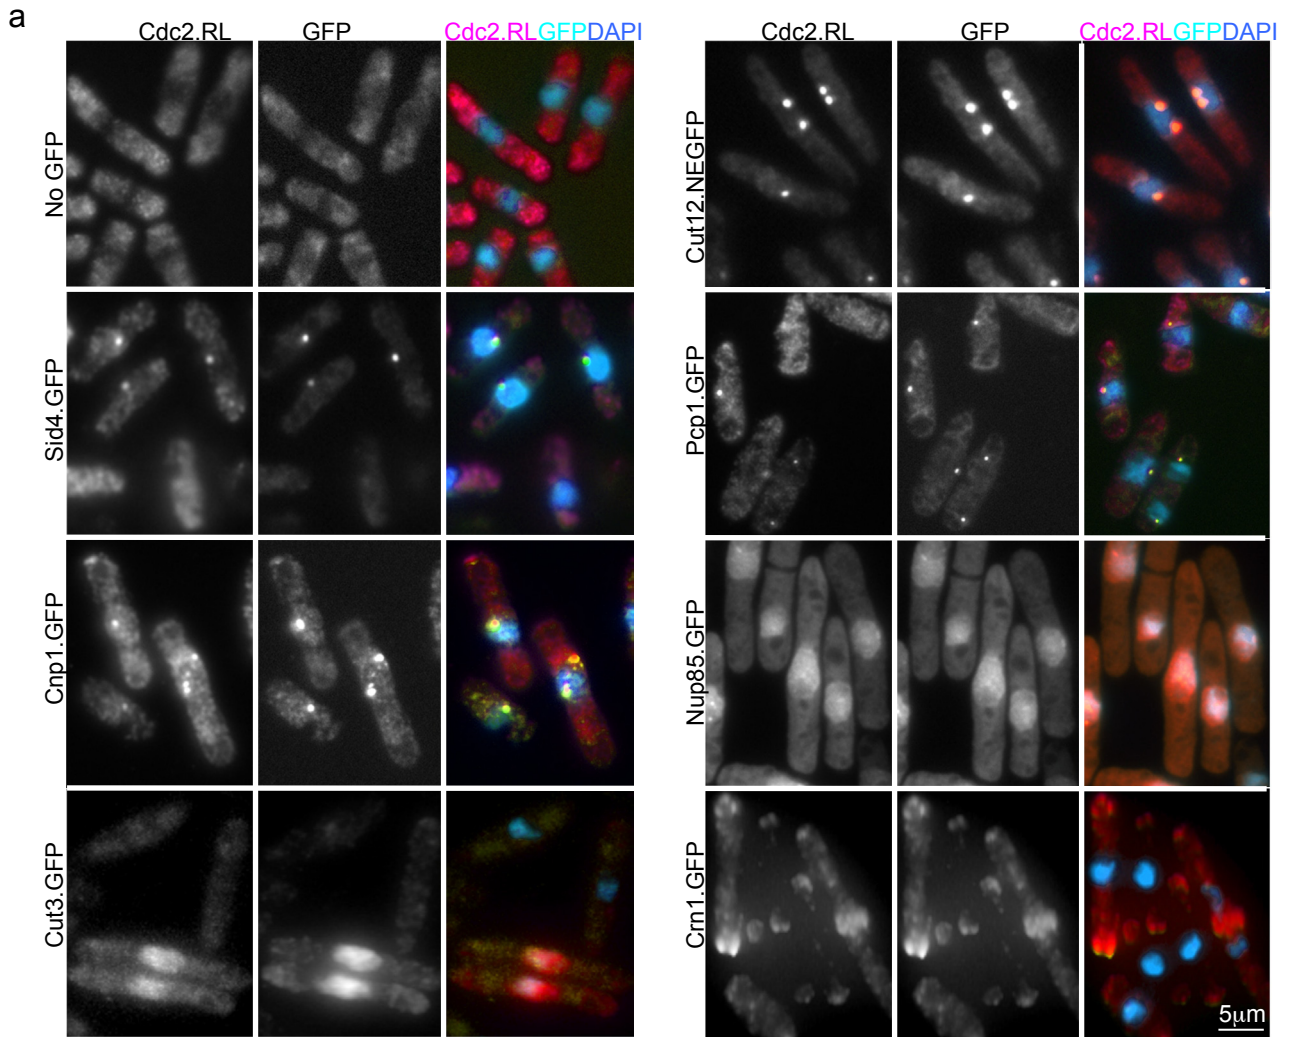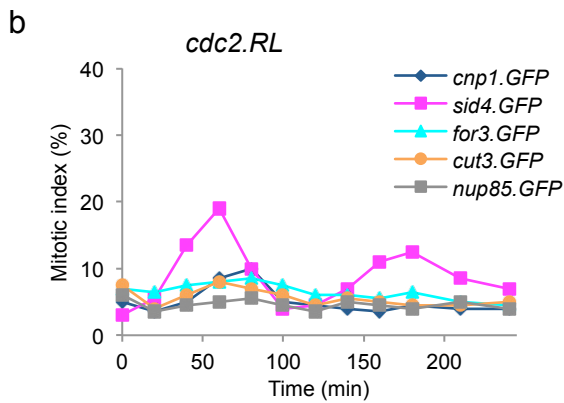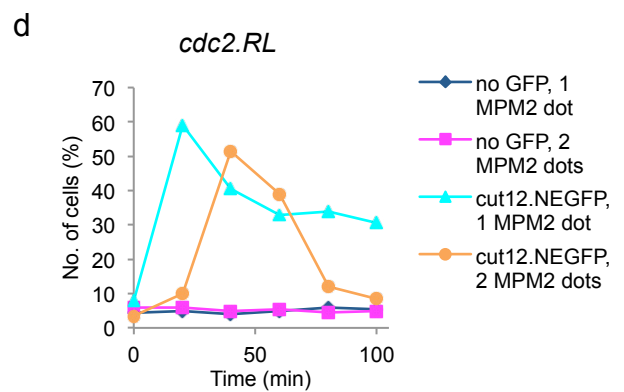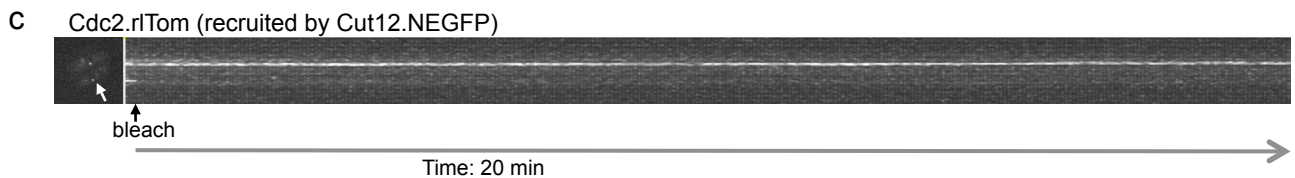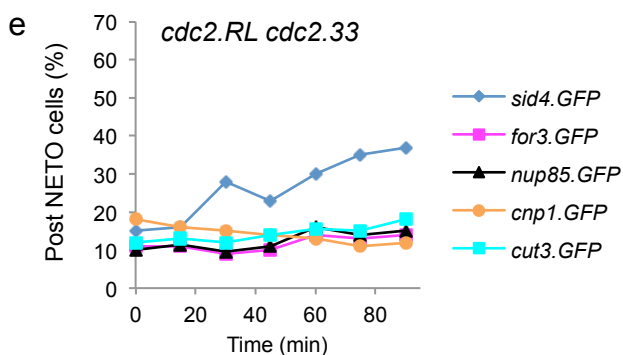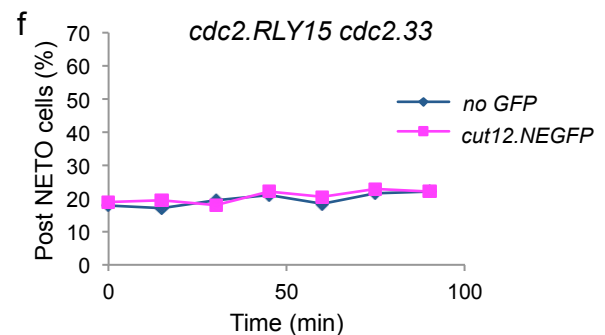

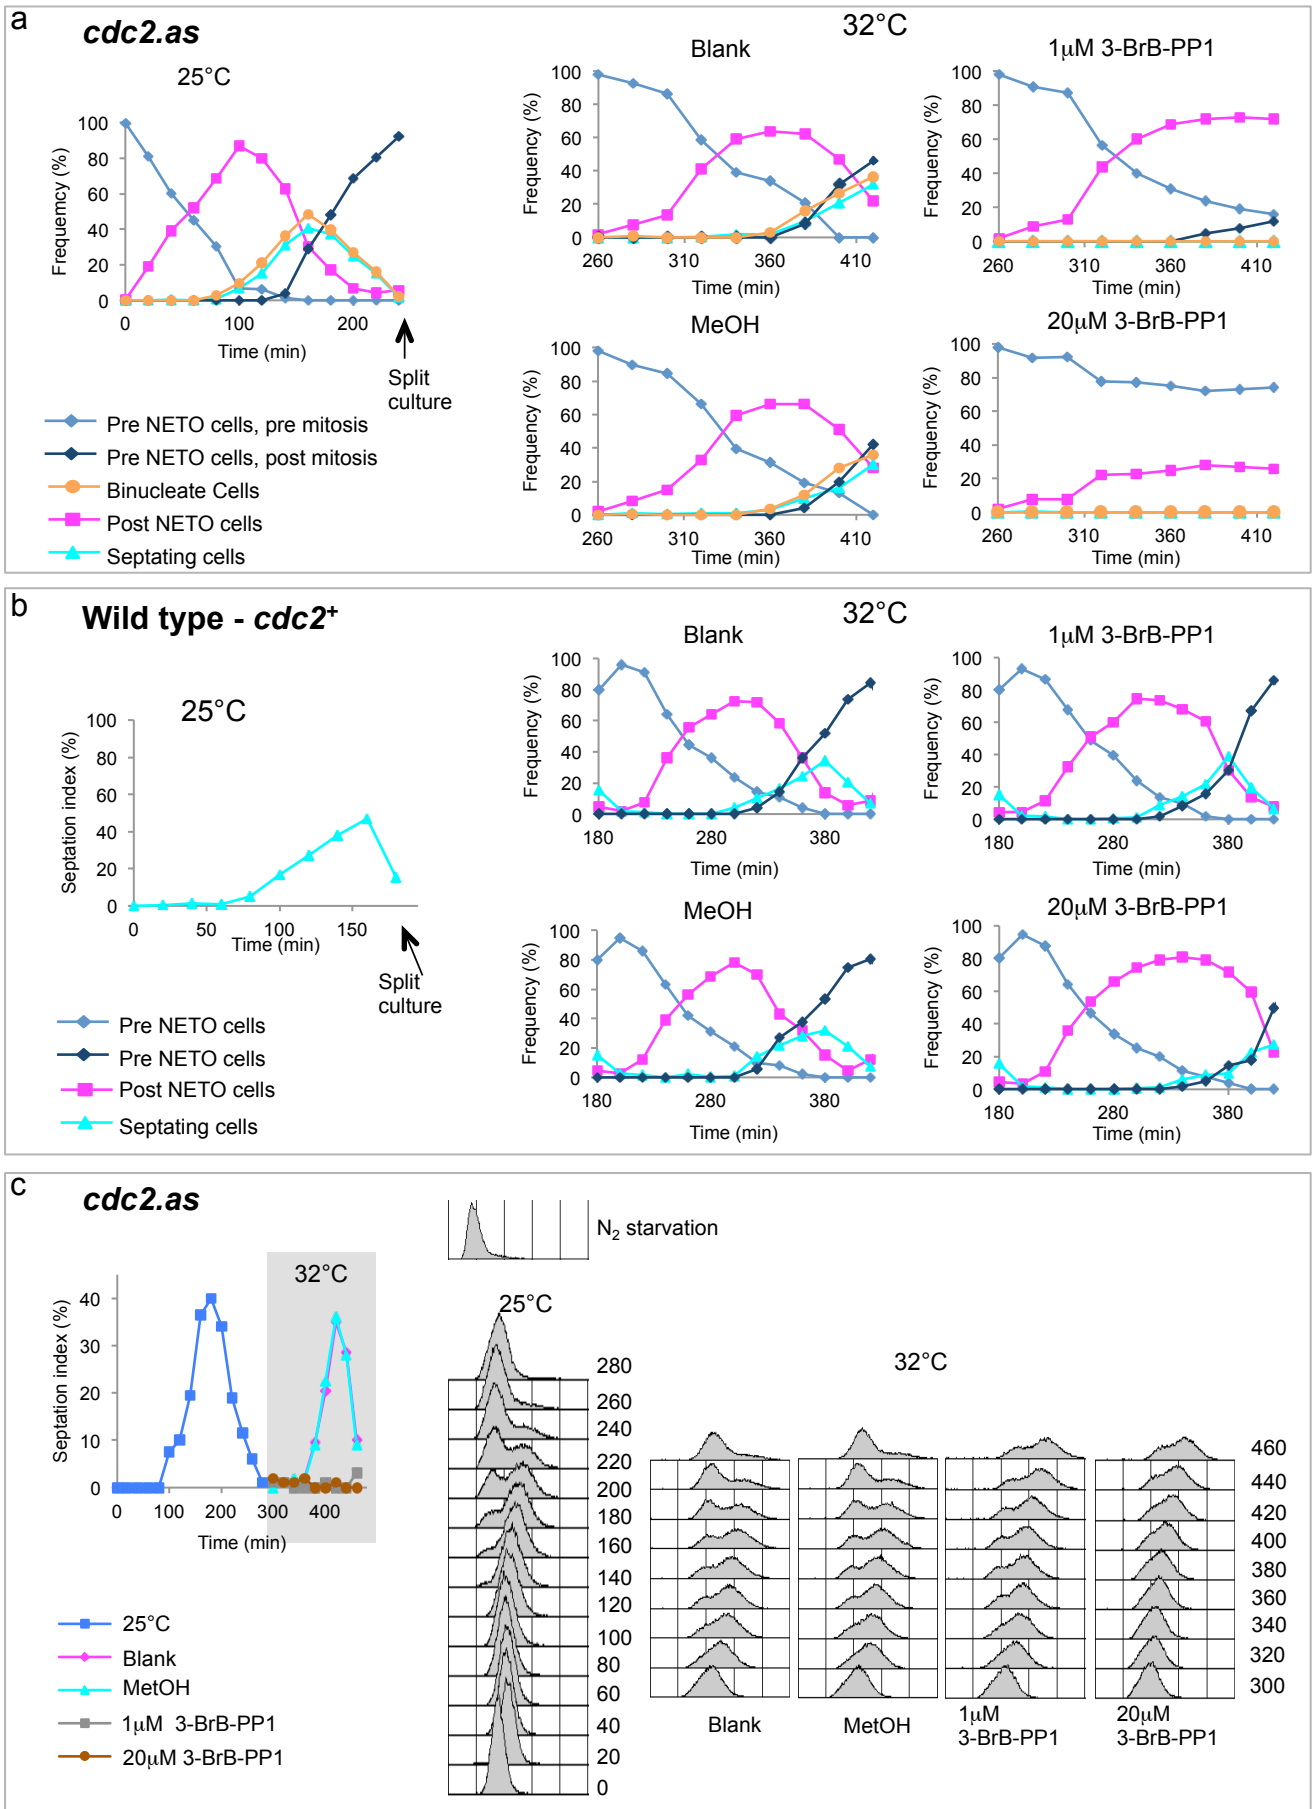

Supplement: NIHMS50349-supplement-1.pdf [file NIHMS50349-supplement-1.pdf]
